# Supplementary material
Source: publisher figshare collection journal article supplement (https://rs.figshare.com/ndownloader/files/28199194)
Supplement: Supplementary file 1 [file 28199194]

require(MASS)
require(vioplot)
require(flexmix)

# Import interaction data ####

events <- read.csv(file.choose()) #read in the aggregated events file

events$Subject <- as.character(events$Subject)
events$Modifiers <- as.character(events$Modifiers)
events$Behavior <- as.character(events$Behavior)

# Get effort and interaction counts ####

#make the observation ID column a character
events$Observation.id <- as.character(events$Observation.id)

#video IDs
obs <- unique(events$Observation.id)

#total observation time per individual
ind_time <- sapply(id,function(x) sum(events$Duration..s.[events$Subject==x & events$Behavior=="visible"]))

#arrays to hold effort and interaction counts in each video
effort <- surfacing <- contact <- array(dim = c(length(obs),length(id),length(id)))

for(i in 1:length(obs)){
  print(i/length(obs))
  for(j in 1:length(id)){
    for(k in 1:length(id)){
      
      start.j <- events$Start..s.[events$Subject == id[j] & events$Observation.id == obs[i]] #the start of all visible states for j in i
      stop.j <- events$Stop..s.[events$Subject == id[j] & events$Observation.id == obs[i]] #the end of all visible spells
      
      total.j <- sum(stop.j - start.j) #total time in video
      
      start.k <- events$Start..s.[events$Subject == id[k] & events$Observation.id == obs[i]] #same for k
      stop.k <- events$Stop..s.[events$Subject == id[k] & events$Observation.id == obs[i]]
      
      total.k <- sum(stop.k - start.k)
      
      if(sum(total.j) > 0 & sum(total.k) > 0){ #if both were seen in the video
        
        int_overlap <- 0 #start an overlap counter
        
        for(x in 1:length(start.k)){ #for each k start
          
          start.kx <- start.k[x]
          stop.kx <- stop.k[x]
          
          for(y in 1:length(start.j)){ #for each j start
            
            start.jy <- start.j[y]
            stop.jy <- stop.j[y]
            
            if((start.kx <= start.jy & start.jy < stop.kx) | (start.jy <= start.kx & start.kx < stop.jy)){
              max.start <- max(c(start.kx,start.jy))
              min.end <- min(c(stop.kx,stop.jy))
              int_overlap <- int_overlap+(min.end-max.start)
            }
            
          }
        }
        
        if(i == 1){
          effort[i,j,k] <- total.j + total.k - int_overlap
        }else{
          effort[i,j,k] <- effort[(i-1),j,k] +  total.j + total.k - int_overlap
        }
        
      }else{
        
        if(i == 1){
          effort[i,j,k] <- total.j + total.k
        }else{
          effort[i,j,k] <- effort[(i-1),j,k] +  total.j + total.k
        }
        
      }
      
    }
  }
  
  for(j in 1:length(id)){
    for(k in 1:length(id)){
      
      contact[i,j,k] <- sum(events$Behavior == "contact" & events$Subject == id[j] & events$Modifiers == id[k] & events$Observation.id == obs[i])
      surfacing[i,j,k] <- sum(events$Behavior == "sync. surfacing" & events$Subject == id[j] & events$Modifiers == id[k] & events$Observation.id == obs[i])
      
    }
  }
}

# Check data ####

all_surf <- all_cont <- list() # a list to hold all interactions
surf.counter <- cont.counter <- 1

#Because each individual was sequentially "followed" in each video, every interaction is recorded twice, once for each individual
#Because of this, there are slight differences (usually less than 1 second) in the time of each event's two recordings.
#We take the midpoint between each recording of the event as the time of occurence, for simplicity

for(i in 1:(length(id)-1)){ #for each individual (except the last one)
  for(j in i:length(id)){ #for all individuals after
    for(k in 1:length(obs)){ #for each observations
      if(any(events$Subject == id[i] & events$Modifiers == id[j] & events$Observation.id == obs[k])){ #if there were any interactions between this dyad in that observation
        
        obs.ijk <- events[events$Observation.id == obs[k] & ((events$Subject == id[i]&events$Modifiers==id[j])|(events$Subject == id[j]&events$Modifiers==id[i]) ),] #get those events
        
        if(any(obs.ijk$Behavior == "sync. surfacing")){
          surf.ijk <- sort(obs.ijk$Start..s.[obs.ijk$Behavior == "sync. surfacing"])
          n_surf <- length(surf.ijk)/2
          surf_time <- rep(NA,n_surf)
          surf_diff <- surf_time
          for(s in 1:n_surf){
            surf_time[s] <- mean(surf.ijk[(s*2-1):(s*2)]) #since events are recorded twice, take the midway point between each event as the "true" time
            surf_diff[s] <- abs(surf.ijk[(s*2-1)] - surf.ijk[(s*2)])
          }
          all_surf[[surf.counter]] <- data.frame(dyad = paste(sort(c(id[i],id[j])),collapse="-"), observation = obs[k], time = surf_time, diff = surf_diff) #save
          surf.counter <- surf.counter+1
        }
        #same thing for contacts
        if(any(obs.ijk$Behavior == "contact")){
          cont.ijk <- sort(obs.ijk$Start..s.[obs.ijk$Behavior == "contact"])
          n_cont <- length(cont.ijk)/2
          cont_time <- rep(NA,n_cont)
          cont_diff <- cont_time
          for(c in 1:n_cont){
            cont_time[c] <- mean(cont.ijk[(c*2-1):(c*2)])
            cont_diff[c] <- abs(cont.ijk[(c*2-1)] - cont.ijk[(c*2)])
          }
          all_cont[[cont.counter]] <- data.frame(dyad = paste(sort(c(id[i],id[j])),collapse="-"), observation = obs[k], time = cont_time, diff = cont_diff)
          cont.counter <- cont.counter+1
        }
        
      }
    }
  }
}

all_surf <- do.call(rbind,all_surf) #turn them into dataframes
all_cont <- do.call(rbind,all_cont)

possible_inds_surf <- possible_inds_cont <- list() #lists to hold possible individuals

#get individuals present during each surfacing interaction
for(i in 1:nrow(all_surf)){
  
  obs.i <- all_surf$observation[i]
  time.i <- all_surf$time[i]
  possible_inds_surf[[i]] <- id[sapply(id, function(x) any(events$Behavior == "visible" & events$Start..s. <= time.i & events$Stop..s. >= time.i & events$Observation.id == obs.i & events$Subject == x) )] #the set of individuals visible when the interaction occured
  
}

#same for contacts
for(i in 1:nrow(all_cont)){
  
  obs.i <- all_cont$observation[i]
  time.i <- all_cont$time[i]
  possible_inds_cont[[i]] <- id[sapply(id, function(x) any(events$Behavior == "visible" & events$Start..s. <= time.i & events$Stop..s. >= time.i & events$Observation.id == obs.i & events$Subject == x) )]
  
}

surf_ints <- do.call(rbind,strsplit(as.character(all_surf$dyad),split="-"))
cont_ints <- do.call(rbind,strsplit(as.character(all_cont$dyad),split="-"))

#All interactions symmetric in each video?
#Lack of symmetry would indicate some interactions were only recorded for one member of a dyad, which would be bad
all(apply(surfacing,1,isSymmetric))
all(apply(contact,1,isSymmetric))

#All individuals marked as visible during their observed interactions?
#If either were false, either some individuals were incorrectly coded as not visible, or were incorrectly coded as interacting
all(sapply(1:nrow(surf_ints), function(z) all(surf_ints[z,] %in% possible_inds_surf[[z]]) ))
all(sapply(1:nrow(cont_ints), function(z) all(cont_ints[z,] %in% possible_inds_cont[[z]]) ))

# Get the portion of contacts within 1 second of a synchronous surfacing

time_to_surf <- sapply(1:nrow(all_cont), function(z){
  
  vid <- all_cont$observation[z]
  time <- all_cont$time[z]
  dy <- all_cont$dyad[z]
  
  if(any(all_surf$dyad == dy & all_surf$observation == vid)){
    times.surf <- all_surf$time[all_surf$observation == vid & all_surf$dyad == dy]
    min(abs(times.surf - time))
  }else{
    NA
  }
  
})
sum(time_to_surf <= 1 & !is.na(time_to_surf))

# interaction rates ####

#total interactions and effort
contact_tot <- apply(contact,c(2,3),sum)
surfacing_tot <- apply(surfacing,c(2,3),sum)
effort_tot <- effort[dim(effort)[1],,]
diag(effort_tot) <- ind_time

#add column and row names
row.names(effort_tot) <- colnames(effort_tot) <- colnames(contact_tot) <- colnames(surfacing_tot) <- row.names(contact_tot) <- row.names(surfacing_tot) <- id

#divide interactions by effort to get rates (per second here)
contact_rate <- contact_tot/effort_tot
surfacing_rate <- surfacing_tot/effort_tot

# temporal overlap ####

co_occur <- effort_tot
#since total effort is ind_time[i] + ind_time[j] - co_occur[i,j], we can get the co-occurerence time by substracting
#total effort from the sum of each individual's total time
for(i in 1:length(id)){
  for(j in 1:length(id)){
    co_occur[i,j] <- ind_time[i] + ind_time[j] - effort_tot[i,j]
  }
}
co_occur[co_occur < 0] <- 0 #there are a few dyads were we end up with values less than zero (~ -3e-12). These have been checked and I'm fairly sure are the result of small rounding errors in R
overlap_portion <- co_occur/effort_tot #portion of time co-occurring
diag(overlap_portion) <- 0 #no self-overlap

# estimate reliability of network data ####
# Function to estimate the correlation between the true and observed interaction rates, following Whitehead (2009)

cor_nb <- function(interactions, sample){
  # log-likelihood function for the negative binomial distribution 
  ll.nb <- function(z){
    mu <- exp(z[1])
    size <- exp(z[2])
    mu.i <- mu*sample
    -sum(dnbinom(interactions, size = size, mu = mu.i, log = T))
  }
  # fit the parameters
  fit <- optim(c(0,0),ll.nb)
  par <- exp(fit$par) # get the parameters
  mu <- par[1] # mean
  size <- par[2] # dispersion
  prob <- size/(size+mu) # probability
  
  # get the parameters of the underlying Gamma
  scale <- (1-prob)/prob # scale parameter
  shape <- size # shape parameter
  sd.gamma <- sqrt(shape*scale^2) #standard deviation
  mu.gamma <- shape*scale #mean
  S.gamma <- sd.gamma/mu.gamma #CV of underlying Gamma (social differentiation)
  G <- mean(interactions) # the G term from equation 4 in Whitehead (2009)
  r <-  sqrt(1/(1 + 1/(S.gamma^2*G))) # estimated correlation coefficient from equation 4 in Whitehead (2009)
  return(r)
}

# correlation for physical contact
cor_nb(contact_tot[lower.tri(contact_tot)], effort_tot[lower.tri(effort_tot)])

# correlation for synchronous surfacing
cor_nb(surfacing_tot[lower.tri(surfacing_tot)], effort_tot[lower.tri(effort_tot)])

# bout analysis ####

# contact

all_dyads <- unique(all_cont$dyad)
all_obs <- unique(all_cont$observation)

cont_diff <- list()
counter = 1
for(i in 1:length(all_dyads)){
  for(k in 1:length(all_obs)){
    
    if(sum(all_cont$dyad == all_dyads[i] & all_cont$observation == all_obs[k]) > 1){
      
      diff <- diff(all_cont$time[all_cont$dyad == all_dyads[i] & all_cont$observation == all_obs[k]])
      cont_diff[[counter]] <- data.frame(dyad = all_dyads[i], observation = all_obs[k], diff)
      counter <- counter + 1
      
    }
    
  }
}

cont_diff <- do.call(rbind,cont_diff)

#surfacing

all_dyads <- unique(all_surf$dyad)
all_obs <- unique(all_surf$observation)

surf_diff <- list()
counter = 1
for(i in 1:length(all_dyads)){
  for(k in 1:length(all_obs)){
    
    if(sum(all_surf$dyad == all_dyads[i] & all_surf$observation == all_obs[k]) > 1){
      
      diff <- diff(all_surf$time[all_surf$dyad == all_dyads[i] & all_surf$observation == all_obs[k]])
      surf_diff[[counter]] <- data.frame(dyad = all_dyads[i], observation = all_obs[k], diff)
      counter <- counter + 1
      
    }
    
  }
}

surf_diff <- do.call(rbind,surf_diff)

# fit 2 models for each, one as a simple Poisson process (i.e. waiting times are exponentially distributed), another as a two component Poisson (i.e. waiting times are distributed as a mixture of two exponentials, one within bout and one between bout)

require(VGAM)

cont_mm <- stepFlexmix(diff ~ 1, data = cont_diff, k = 1:2, model = FLXMCdist1(formula = diff ~ 1, "exp"), nrep = 10)
surf_mm <- stepFlexmix(diff ~ 1, data = surf_diff, k = 1:2, model = FLXMCdist1(formula = diff ~ 1, "exp"), nrep = 10)

# get network measures ####

cv.net <- function(network){
  sd(network[lower.tri(network)],na.rm=T)/mean(network[lower.tri(network)],na.rm=T)
}

cv.cont <- cv.net(contact_rate)
cv.surf <- cv.net(surfacing_rate)

# Permutation-based null model of random interactions ####

#array to hold permuted values
contact_perm <- surf_perm <- array(0, dim = c(10000,length(id),length(id)))

for(x in 1:10000){
  
  print(x)
  
  cont_ints.p <- do.call(rbind,lapply(possible_inds_cont,function(z){
    sort(sample(z,2)) #choose two individuals that were present for each interaction
  }))
  
  cont.perm <- apply(cont_ints.p,1,paste,collapse="-") #interacting dyads
  
  surf_ints.p <- do.call(rbind,lapply(possible_inds_surf,function(z){
    sort(sample(z,2)) #choose two individuals that were present for each interaction
  }))
  
  surf.perm <- apply(surf_ints.p,1,paste,collapse="-") #interacting dyads
  
  for(i in 1:(length(id)-1)){ #loop through individuals getting permuted contact/surfacing counts
    
    for(j in (i+1):length(id)){
      
      dyad <- paste(sort(c(id[i],id[j])),collapse="-")
      contact_perm[x,i,j] <- contact_perm[x,j,i] <- sum(cont.perm==dyad)
      surf_perm[x,i,j] <- surf_perm[x,j,i] <- sum(surf.perm==dyad)
      
    }
  }
  
}

#Get randomized values for all four network statistics for both interaction types

cv.cont.p <- apply(contact_perm,1,function(z){
  cv.net(z/effort_tot)
})
cv.surf.p <- apply(surf_perm,1,function(z){
  cv.net(z/effort_tot)
})

r.cont.p <- apply(contact_perm, 1, function(z){
  cr <- z/effort_tot
  cor(cr[lower.tri(cr)], overlap_portion[lower.tri(overlap_portion)], method = "spearman")
})
r.surf.p <- apply(surf_perm, 1, function(z){
  cr <- z/effort_tot
  cor(cr[lower.tri(cr)], overlap_portion[lower.tri(overlap_portion)], method = "spearman")
})

par(mfrow = c(2,1))

vioplot(cbind(cv.cont.p,cv.surf.p), names = c("Contact", "Surfacing"), ylab = "CV")
points(c(cv.cont,cv.surf), col = "red", pch = 16)

r.cont <- cor(contact_rate[lower.tri(contact_rate)], overlap_portion[lower.tri(overlap_portion)], method = "spearman")
r.surf <- cor(surfacing_rate[lower.tri(surfacing_rate)], overlap_portion[lower.tri(overlap_portion)], method = "spearman")

vioplot(cbind(r.cont.p,r.surf.p), names = c("Contact", "Surfacing"), ylab = "Correlation")
points(c(r.cont,r.surf), col = "red", pch = 16)

# Comparing the surfacing and contact networks ####

#arrays to hold the permuted networks
surf_interchange <- cont_interchange <- array(0, dim = c(10000, length(id), length(id)))

#add a "type" column to our datasets of all observed interactions
cont_ints <- as.data.frame(cont_ints)
cont_ints$type <- "c"
surf_ints <- as.data.frame(surf_ints)
surf_ints$type <- "s"

#stick the datasets together
all_ints <- rbind(cont_ints,surf_ints)

for(p in 1:10000){
  
  print(p/10000)
  
  all_ints$type <- sample(all_ints$type) #shuffle the type labels
  cont_ints_p <- as.matrix(all_ints[all_ints$type == "c", c(1,2)]) #pull out permuted sets of interactions
  surf_ints_p <- as.matrix(all_ints[all_ints$type == "s", c(1,2)])
  
  #calculate new interaction counts of both types
  for(i in 1:(length(id)-1)){
    for(j in 2:length(id)){
      cont_interchange[p,i,j] <- cont_interchange[p,j,i] <- sum( (cont_ints_p[,1] == id[i] & cont_ints_p[,2] == id[j]) | (cont_ints_p[,2] == id[i] & cont_ints_p[,1] == id[j])  )
      surf_interchange[p,i,j] <- surf_interchange[p,j,i] <- sum( (surf_ints_p[,1] == id[i] & surf_ints_p[,2] == id[j]) | (surf_ints_p[,2] == id[i] & surf_ints_p[,1] == id[j])  )
    }
  }
  
}

# Compare structure between networks

#CV
cv.cont.ic <- apply(cont_interchange,1,function(z){
  crp <- z/effort_tot
  cv.net(crp)
})
cv.surf.ic <- apply(surf_interchange,1,function(z){
  srp <- z/effort_tot
  cv.net(srp)
})

cv.diff <- cv.cont - cv.surf
cv.diff.ic <- cv.cont.ic - cv.surf.ic

cor.ic <- sapply(1:10000, function(z){
  cr <- cont_interchange[z,,]/effort_tot
  sr <- surf_interchange[z,,]/effort_tot
  cor(cr[lower.tri(cr)],sr[lower.tri(sr)], method = "spearman")
})

par(mfrow = c(1,2))

hist(cv.diff.ic, breaks = 100, col = "grey", border = NA)
abline(v = cv.diff, col = "red")

hist(cor.ic, breaks = 100, col = "grey", border = NA)
abline(v = cor(contact_rate[lower.tri(contact_rate)], surfacing_rate[lower.tri(surfacing_rate)], method = "spearman"), col = "red")

# Mantel tests

vegan::mantel(contact_rate, surfacing_rate)
vegan::mantel(contact_rate, overlap_portion)
vegan::mantel(surfacing_rate, overlap_portion)
